# Supplementary material
Source: PubMed Central journal article supplement (PMC9288976)
Supplement: NIHMS1801158-supplement-Supplemental_File.pdf [file NIHMS1801158-supplement-Supplemental_File.pdf]

SUPPLEMENTARY MATERIAL FOR ONLINE PUBLICATION

for

“Toward Evaluation of Disseminated Effects of Medications for  
Opioid Use Disorder within Provider-Based Clusters Using  
Routinely-Collected Health Data”

May 9, 2022

## Appendix: Supplemental Tables and Figures

Table A1: Cumulative incidence of overdose in Optum's de-identified Clinformatics® Data Mart Database, 2010-2015, United States

| MOUD Coverage        | All patients |          |             |            |
|----------------------|--------------|----------|-------------|------------|
|                      | Total Person | Overdose | Cum Inc (%) | (95%CI)    |
| $\leq 33\%$          | 459          | 19       | 4.14        | (2.3, 5.9) |
| $> 33\% - \leq 50\%$ | 605          | 25       | 4.13        | (2.5, 5.7) |
| $> 50\%$             | 1,209        | 39       | 3.2         | (2.2, 4.2) |
| All                  | 2,273        | 83       | 3.7         | (2.9, 4.5) |

Table A2: Simulation results with equal cluster sizes for direct, disseminated, composite and overall effects with different distributions for the random intercepts in the cluster-level propensity score model for 1000 simulated data sets.<sup>a</sup>

| Estimand       | Truth  | Horvitz-Thompson |         |        |        | Hájek |        |        |         |        |        |       |
|----------------|--------|------------------|---------|--------|--------|-------|--------|--------|---------|--------|--------|-------|
|                |        | IPW              | %Bias   | ESE    | ASE    | CP    | Truth  | IPW    | %Bias   | ESE    | ASE    | CP    |
| Normal         |        |                  |         |        |        |       |        |        |         |        |        |       |
| DE(0.33)       | 0.0127 | 0.0164           | 0.2916  | 0.0122 | 0.0117 | 0.925 | 0.0127 | 0.0128 | 0.0107  | 0.0119 | 0.0118 | 0.942 |
| IE(0.33, 0.5)  | 0.0042 | 0.0057           | 0.3703  | 0.0040 | 0.0038 | 0.927 | 0.0042 | 0.0040 | -0.0449 | 0.0036 | 0.0036 | 0.930 |
| TE(0.33, 0.5)  | 0.0125 | 0.0159           | 0.2657  | 0.0114 | 0.0108 | 0.926 | 0.0125 | 0.0126 | 0.0019  | 0.0110 | 0.0107 | 0.941 |
| OE(0.33, 0.5)  | 0.0042 | 0.0054           | 0.2928  | 0.0035 | 0.0033 | 0.940 | 0.0042 | 0.0040 | -0.0290 | 0.0031 | 0.0030 | 0.931 |
| DE(0.5)        | 0.0084 | 0.0101           | 0.2136  | 0.0100 | 0.0095 | 0.928 | 0.0084 | 0.0086 | 0.0252  | 0.0101 | 0.0099 | 0.941 |
| IE(0.5, 0.67)  | 0.0040 | 0.0051           | 0.2818  | 0.0036 | 0.0034 | 0.925 | 0.0040 | 0.0038 | -0.0469 | 0.0035 | 0.0033 | 0.941 |
| TE(0.5, 0.67)  | 0.0082 | 0.0094           | 0.1395  | 0.0097 | 0.0092 | 0.941 | 0.0082 | 0.0083 | 0.0116  | 0.0097 | 0.0094 | 0.942 |
| OE(0.5, 0.67)  | 0.0027 | 0.0029           | 0.0909  | 0.0026 | 0.0025 | 0.944 | 0.0027 | 0.0025 | -0.0409 | 0.0025 | 0.0024 | 0.944 |
| DE(0.67)       | 0.0042 | 0.0043           | 0.0054  | 0.0094 | 0.0090 | 0.945 | 0.0042 | 0.0045 | 0.0667  | 0.0097 | 0.0095 | 0.946 |
| IE(0.33, 0.67) | 0.0082 | 0.0108           | 0.3270  | 0.0073 | 0.0070 | 0.925 | 0.0082 | 0.0078 | -0.0459 | 0.0069 | 0.0066 | 0.938 |
| TE(0.33, 0.67) | 0.0124 | 0.0151           | 0.2172  | 0.0111 | 0.0105 | 0.934 | 0.0124 | 0.0123 | -0.0074 | 0.0106 | 0.0102 | 0.933 |
| OE(0.33, 0.67) | 0.0068 | 0.0083           | 0.2143  | 0.0058 | 0.0055 | 0.940 | 0.0068 | 0.0066 | -0.0336 | 0.0054 | 0.0052 | 0.944 |
| Right Skewed   |        |                  |         |        |        |       |        |        |         |        |        |       |
| DE(0.33)       | 0.0127 | 0.0153           | 0.2090  | 0.0117 | 0.0116 | 0.941 | 0.0127 | 0.0124 | -0.0181 | 0.0114 | 0.0113 | 0.940 |
| IE(0.33, 0.5)  | 0.0042 | 0.0055           | 0.3159  | 0.0039 | 0.0037 | 0.934 | 0.0042 | 0.0042 | 0.0079  | 0.0036 | 0.0034 | 0.938 |
| TE(0.33, 0.5)  | 0.0125 | 0.0152           | 0.2168  | 0.0107 | 0.0107 | 0.948 | 0.0125 | 0.0123 | -0.0172 | 0.0103 | 0.0104 | 0.947 |
| OE(0.33, 0.5)  | 0.0042 | 0.0053           | 0.2748  | 0.0033 | 0.0032 | 0.952 | 0.0042 | 0.0041 | -0.0134 | 0.0030 | 0.0030 | 0.935 |
| DE(0.5)        | 0.0084 | 0.0098           | 0.1675  | 0.0095 | 0.0094 | 0.946 | 0.0084 | 0.0081 | -0.0297 | 0.0095 | 0.0095 | 0.940 |
| IE(0.5, 0.67)  | 0.0040 | 0.0053           | 0.3314  | 0.0034 | 0.0033 | 0.919 | 0.0040 | 0.0039 | -0.0109 | 0.0033 | 0.0032 | 0.938 |
| TE(0.5, 0.67)  | 0.0082 | 0.0091           | 0.1122  | 0.0091 | 0.0091 | 0.947 | 0.0082 | 0.0080 | -0.0292 | 0.0091 | 0.0091 | 0.939 |
| OE(0.5, 0.67)  | 0.0027 | 0.0030           | 0.1314  | 0.0024 | 0.0025 | 0.954 | 0.0027 | 0.0026 | -0.0176 | 0.0023 | 0.0024 | 0.952 |
| DE(0.67)       | 0.0042 | 0.0038           | -0.0946 | 0.0091 | 0.0089 | 0.937 | 0.0042 | 0.0040 | -0.0465 | 0.0093 | 0.0091 | 0.938 |
| IE(0.33, 0.67) | 0.0082 | 0.0108           | 0.3234  | 0.0071 | 0.0068 | 0.933 | 0.0082 | 0.0081 | -0.0013 | 0.0067 | 0.0064 | 0.944 |
| TE(0.33, 0.67) | 0.0124 | 0.0146           | 0.1807  | 0.0104 | 0.0104 | 0.950 | 0.0124 | 0.0122 | -0.0167 | 0.0099 | 0.0100 | 0.943 |
| OE(0.33, 0.67) | 0.0068 | 0.0083           | 0.2191  | 0.0054 | 0.0055 | 0.955 | 0.0068 | 0.0067 | -0.0150 | 0.0050 | 0.0051 | 0.946 |
| Left Skewed    |        |                  |         |        |        |       |        |        |         |        |        |       |
| DE(0.33)       | 0.0127 | 0.0172           | 0.3550  | 0.0122 | 0.0120 | 0.927 | 0.0127 | 0.0129 | 0.0172  | 0.0119 | 0.0116 | 0.943 |
| IE(0.33, 0.5)  | 0.0042 | 0.0066           | 0.5916  | 0.0039 | 0.0039 | 0.937 | 0.0042 | 0.0045 | 0.0714  | 0.0035 | 0.0036 | 0.956 |
| TE(0.33, 0.5)  | 0.0125 | 0.0165           | 0.3202  | 0.0110 | 0.0110 | 0.945 | 0.0125 | 0.0129 | 0.0297  | 0.0106 | 0.0106 | 0.947 |
| OE(0.33, 0.5)  | 0.0042 | 0.0059           | 0.4218  | 0.0033 | 0.0034 | 0.942 | 0.0042 | 0.0045 | 0.0753  | 0.0030 | 0.0031 | 0.951 |
| DE(0.5)        | 0.0084 | 0.0099           | 0.1849  | 0.0098 | 0.0096 | 0.941 | 0.0084 | 0.0084 | 0.0089  | 0.0099 | 0.0097 | 0.935 |
| IE(0.5, 0.67)  | 0.0040 | 0.0055           | 0.3737  | 0.0034 | 0.0035 | 0.938 | 0.0040 | 0.0043 | 0.0718  | 0.0033 | 0.0034 | 0.959 |
| TE(0.5, 0.67)  | 0.0082 | 0.0093           | 0.1268  | 0.0093 | 0.0092 | 0.937 | 0.0082 | 0.0084 | 0.0207  | 0.0093 | 0.0093 | 0.941 |
| OE(0.5, 0.67)  | 0.0027 | 0.0031           | 0.1553  | 0.0024 | 0.0025 | 0.948 | 0.0027 | 0.0028 | 0.0581  | 0.0023 | 0.0024 | 0.945 |
| DE(0.67)       | 0.0042 | 0.0038           | -0.1061 | 0.0092 | 0.0090 | 0.934 | 0.0042 | 0.0041 | -0.0274 | 0.0095 | 0.0093 | 0.937 |
| IE(0.33, 0.67) | 0.0082 | 0.0121           | 0.4850  | 0.0070 | 0.0072 | 0.933 | 0.0082 | 0.0087 | 0.0716  | 0.0066 | 0.0068 | 0.960 |
| TE(0.33, 0.67) | 0.0124 | 0.0159           | 0.2832  | 0.0106 | 0.0107 | 0.945 | 0.0124 | 0.0129 | 0.0378  | 0.0101 | 0.0102 | 0.947 |
| OE(0.33, 0.67) | 0.0068 | 0.0090           | 0.3183  | 0.0055 | 0.0056 | 0.942 | 0.0068 | 0.0073 | 0.0686  | 0.0051 | 0.0052 | 0.957 |
| Bimodal        |        |                  |         |        |        |       |        |        |         |        |        |       |
| DE(0.33)       | 0.0127 | 0.0158           | 0.2493  | 0.0121 | 0.0116 | 0.936 | 0.0127 | 0.0126 | -0.0032 | 0.0118 | 0.0114 | 0.946 |
| IE(0.33, 0.5)  | 0.0042 | 0.0054           | 0.2975  | 0.0037 | 0.0037 | 0.939 | 0.0042 | 0.0039 | -0.0540 | 0.0034 | 0.0034 | 0.940 |
| TE(0.33, 0.5)  | 0.0125 | 0.0157           | 0.2505  | 0.0111 | 0.0106 | 0.937 | 0.0125 | 0.0125 | -0.0050 | 0.0108 | 0.0104 | 0.936 |
| OE(0.33, 0.5)  | 0.0042 | 0.0053           | 0.2758  | 0.0033 | 0.0032 | 0.940 | 0.0042 | 0.0040 | -0.0381 | 0.0030 | 0.0030 | 0.924 |
| DE(0.5)        | 0.0084 | 0.0103           | 0.2271  | 0.0100 | 0.0095 | 0.938 | 0.0084 | 0.0085 | 0.0194  | 0.0100 | 0.0096 | 0.934 |
| IE(0.5, 0.67)  | 0.0040 | 0.0052           | 0.2987  | 0.0033 | 0.0033 | 0.937 | 0.0040 | 0.0038 | -0.0533 | 0.0032 | 0.0032 | 0.945 |
| TE(0.5, 0.67)  | 0.0082 | 0.0096           | 0.1652  | 0.0097 | 0.0091 | 0.938 | 0.0082 | 0.0083 | 0.0104  | 0.0097 | 0.0092 | 0.934 |
| OE(0.5, 0.67)  | 0.0027 | 0.0030           | 0.1313  | 0.0026 | 0.0025 | 0.932 | 0.0027 | 0.0026 | -0.0341 | 0.0025 | 0.0024 | 0.930 |
| DE(0.67)       | 0.0042 | 0.0044           | 0.0393  | 0.0095 | 0.0090 | 0.938 | 0.0042 | 0.0045 | 0.0705  | 0.0097 | 0.0093 | 0.933 |
| IE(0.33, 0.67) | 0.0082 | 0.0106           | 0.2981  | 0.0068 | 0.0067 | 0.940 | 0.0082 | 0.0077 | -0.0536 | 0.0064 | 0.0064 | 0.944 |
| TE(0.33, 0.67) | 0.0124 | 0.0150           | 0.2097  | 0.0109 | 0.0103 | 0.934 | 0.0124 | 0.0123 | -0.0113 | 0.0104 | 0.0100 | 0.933 |
| OE(0.33, 0.67) | 0.0068 | 0.0083           | 0.2197  | 0.0056 | 0.0054 | 0.938 | 0.0068 | 0.0066 | -0.0365 | 0.0052 | 0.0051 | 0.937 |

<sup>a</sup> IPW = Mean of inverse probability weighted estimates; ESE = empirical standard error; ASE = average estimated standard error; CP = empirical coverage probability).

Table A3: Simulation results with unequal cluster sizes for direct, disseminated, composite and overall effects with different distributions for the random intercepts in the cluster-level propensity score model for 1000 simulated data sets.<sup>a</sup>

| Estimand       | Truth  | Horvitz-Thompson |         |        |        | Hájek |        |        |         |        |        |       |
|----------------|--------|------------------|---------|--------|--------|-------|--------|--------|---------|--------|--------|-------|
|                |        | IPW              | %Bias   | ESE    | ASE    | CP    | Truth  | IPW    | %Bias   | ESE    | ASE    | CP    |
| Normal         |        |                  |         |        |        |       |        |        |         |        |        |       |
| DE(0.33)       | 0.0132 | 0.0165           | 0.2500  | 0.0123 | 0.0122 | 0.939 | 0.0132 | 0.0116 | -0.1212 | 0.0124 | 0.0134 | 0.945 |
| IE(0.33, 0.5)  | 0.0039 | 0.0051           | 0.3333  | 0.0036 | 0.0036 | 0.948 | 0.0039 | 0.0042 | 0.0769  | 0.0045 | 0.0053 | 0.959 |
| TE(0.33, 0.5)  | 0.0132 | 0.0163           | 0.2424  | 0.0115 | 0.0114 | 0.943 | 0.0132 | 0.0116 | -0.1212 | 0.0111 | 0.0120 | 0.930 |
| OE(0.33, 0.5)  | 0.0042 | 0.0053           | 0.2619  | 0.0033 | 0.0032 | 0.935 | 0.0042 | 0.0040 | -0.0238 | 0.0038 | 0.0044 | 0.932 |
| DE(0.5)        | 0.0093 | 0.0112           | 0.2043  | 0.0105 | 0.0103 | 0.938 | 0.0093 | 0.0074 | -0.2043 | 0.0099 | 0.0102 | 0.930 |
| IE(0.5, 0.67)  | 0.0037 | 0.0046           | 0.2162  | 0.0034 | 0.0033 | 0.929 | 0.0037 | 0.0039 | 0.0270  | 0.0043 | 0.0043 | 0.934 |
| TE(0.5, 0.67)  | 0.0092 | 0.0107           | 0.1522  | 0.0101 | 0.0100 | 0.937 | 0.0092 | 0.0075 | -0.1848 | 0.0095 | 0.0097 | 0.929 |
| OE(0.5, 0.67)  | 0.0028 | 0.0031           | 0.1071  | 0.0026 | 0.0025 | 0.948 | 0.0028 | 0.0026 | -0.0357 | 0.0031 | 0.0030 | 0.927 |
| DE(0.67)       | 0.0055 | 0.0061           | 0.1091  | 0.0099 | 0.0098 | 0.940 | 0.0055 | 0.0037 | -0.3455 | 0.0093 | 0.0095 | 0.930 |
| IE(0.33, 0.67) | 0.0076 | 0.0097           | 0.2763  | 0.0068 | 0.0067 | 0.931 | 0.0076 | 0.0081 | 0.0658  | 0.0079 | 0.0088 | 0.947 |
| TE(0.33, 0.67) | 0.0131 | 0.0158           | 0.2061  | 0.0112 | 0.0111 | 0.940 | 0.0131 | 0.0117 | -0.1069 | 0.0106 | 0.0115 | 0.928 |
| OE(0.33, 0.67) | 0.0069 | 0.0083           | 0.2029  | 0.0056 | 0.0055 | 0.947 | 0.0069 | 0.0067 | -0.0290 | 0.0061 | 0.0067 | 0.922 |
| Right Skewed   |        |                  |         |        |        |       |        |        |         |        |        |       |
| DE(0.33)       | 0.0132 | 0.0589           | 3.4545  | 0.0178 | 0.0172 | 0.271 | 0.0132 | 0.0347 | 1.6212  | 0.0155 | 0.0160 | 0.585 |
| IE(0.33, 0.5)  | 0.0039 | 0.0033           | -0.1282 | 0.0044 | 0.0045 | 0.943 | 0.0039 | 0.0038 | -0.0256 | 0.0036 | 0.0040 | 0.955 |
| TE(0.33, 0.5)  | 0.0132 | 0.0592           | 3.4848  | 0.0159 | 0.0155 | 0.178 | 0.0132 | 0.0327 | 1.4773  | 0.0133 | 0.0140 | 0.602 |
| OE(0.33, 0.5)  | 0.0042 | 0.0118           | 1.8333  | 0.0041 | 0.0041 | 0.536 | 0.0042 | 0.0064 | 0.5476  | 0.0033 | 0.0035 | 0.916 |
| DE(0.5)        | 0.0093 | 0.0559           | 5.0108  | 0.0142 | 0.0137 | 0.132 | 0.0093 | 0.0289 | 2.1075  | 0.0121 | 0.0124 | 0.527 |
| IE(0.5, 0.67)  | 0.0037 | 0.0033           | -0.1081 | 0.0044 | 0.0045 | 0.945 | 0.0037 | 0.0046 | 0.2432  | 0.0034 | 0.0034 | 0.953 |
| TE(0.5, 0.67)  | 0.0092 | 0.0556           | 5.0326  | 0.0126 | 0.0123 | 0.049 | 0.0092 | 0.0266 | 1.8913  | 0.0101 | 0.0108 | 0.564 |
| OE(0.5, 0.67)  | 0.0028 | 0.0104           | 2.7143  | 0.0031 | 0.0031 | 0.267 | 0.0028 | 0.0051 | 0.8214  | 0.0027 | 0.0028 | 0.886 |
| DE(0.67)       | 0.0055 | 0.0522           | 8.4909  | 0.0121 | 0.0117 | 0.037 | 0.0055 | 0.0220 | 3.0000  | 0.0097 | 0.0103 | 0.558 |
| IE(0.33, 0.67) | 0.0076 | 0.0067           | -0.1184 | 0.0088 | 0.0089 | 0.943 | 0.0076 | 0.0084 | 0.1053  | 0.0069 | 0.0074 | 0.956 |
| TE(0.33, 0.67) | 0.0131 | 0.0589           | 3.4962  | 0.0145 | 0.0143 | 0.097 | 0.0131 | 0.0304 | 1.3206  | 0.0116 | 0.0126 | 0.666 |
| OE(0.33, 0.67) | 0.0069 | 0.0222           | 2.2174  | 0.0070 | 0.0069 | 0.399 | 0.0069 | 0.0115 | 0.6667  | 0.0057 | 0.0060 | 0.904 |
| Left Skewed    |        |                  |         |        |        |       |        |        |         |        |        |       |
| DE(0.33)       | 0.0132 | 0.0626           | 3.7348  | 0.0240 | 0.0221 | 0.304 | 0.0132 | 0.0267 | 1.0227  | 0.0198 | 0.0178 | 0.689 |
| IE(0.33, 0.5)  | 0.0039 | 0.0058           | 0.4872  | 0.0057 | 0.0056 | 0.928 | 0.0039 | 0.0025 | -0.3333 | 0.0039 | 0.0039 | 0.931 |
| TE(0.33, 0.5)  | 0.0132 | 0.0623           | 3.7197  | 0.0211 | 0.0199 | 0.265 | 0.0132 | 0.0244 | 0.8561  | 0.0162 | 0.0153 | 0.808 |
| OE(0.33, 0.5)  | 0.0042 | 0.0134           | 2.1905  | 0.0051 | 0.0050 | 0.574 | 0.0042 | 0.0048 | 0.1429  | 0.0035 | 0.0036 | 0.947 |
| DE(0.5)        | 0.0093 | 0.0565           | 5.0753  | 0.0193 | 0.0177 | 0.236 | 0.0093 | 0.0219 | 1.3548  | 0.0156 | 0.0143 | 0.694 |
| IE(0.5, 0.67)  | 0.0037 | 0.0055           | 0.4595  | 0.0057 | 0.0056 | 0.930 | 0.0037 | 0.0037 | -0.0270 | 0.0038 | 0.0038 | 0.938 |
| TE(0.5, 0.67)  | 0.0092 | 0.0556           | 5.0326  | 0.0168 | 0.0159 | 0.174 | 0.0092 | 0.0197 | 1.1304  | 0.0124 | 0.0121 | 0.829 |
| OE(0.5, 0.67)  | 0.0028 | 0.0108           | 2.8571  | 0.0038 | 0.0037 | 0.425 | 0.0028 | 0.0039 | 0.4286  | 0.0029 | 0.0030 | 0.947 |
| DE(0.67)       | 0.0055 | 0.0501           | 8.1091  | 0.0166 | 0.0154 | 0.179 | 0.0055 | 0.0160 | 1.9091  | 0.0125 | 0.0119 | 0.811 |
| IE(0.33, 0.67) | 0.0076 | 0.0112           | 0.4737  | 0.0114 | 0.0111 | 0.930 | 0.0076 | 0.0062 | -0.1842 | 0.0077 | 0.0076 | 0.938 |
| TE(0.33, 0.67) | 0.0131 | 0.0613           | 3.6794  | 0.0188 | 0.0182 | 0.213 | 0.0131 | 0.0222 | 0.6947  | 0.0132 | 0.0132 | 0.898 |
| OE(0.33, 0.67) | 0.0069 | 0.0242           | 2.4928  | 0.0086 | 0.0085 | 0.475 | 0.0069 | 0.0087 | 0.2609  | 0.0060 | 0.0062 | 0.953 |
| Bimodal        |        |                  |         |        |        |       |        |        |         |        |        |       |
| DE(0.33)       | 0.0132 | 0.0161           | 0.2121  | 0.0126 | 0.0122 | 0.941 | 0.0132 | 0.0114 | -0.1439 | 0.0109 | 0.0108 | 0.944 |
| IE(0.33, 0.5)  | 0.0039 | 0.0049           | 0.2821  | 0.0036 | 0.0035 | 0.928 | 0.0039 | 0.0036 | -0.0513 | 0.0040 | 0.0037 | 0.944 |
| TE(0.33, 0.5)  | 0.0132 | 0.0163           | 0.2424  | 0.0116 | 0.0113 | 0.944 | 0.0132 | 0.0113 | -0.1364 | 0.0098 | 0.0098 | 0.943 |
| OE(0.33, 0.5)  | 0.0042 | 0.0053           | 0.2857  | 0.0033 | 0.0032 | 0.947 | 0.0042 | 0.0037 | -0.1190 | 0.0032 | 0.0031 | 0.925 |
| DE(0.5)        | 0.0093 | 0.0114           | 0.2258  | 0.0104 | 0.0103 | 0.946 | 0.0093 | 0.0077 | -0.1720 | 0.0094 | 0.0093 | 0.939 |
| IE(0.5, 0.67)  | 0.0037 | 0.0049           | 0.3243  | 0.0035 | 0.0033 | 0.924 | 0.0037 | 0.0035 | -0.0541 | 0.0043 | 0.0039 | 0.940 |
| TE(0.5, 0.67)  | 0.0092 | 0.0110           | 0.1957  | 0.0100 | 0.0100 | 0.944 | 0.0092 | 0.0077 | -0.1630 | 0.0092 | 0.0090 | 0.935 |
| OE(0.5, 0.67)  | 0.0028 | 0.0033           | 0.1786  | 0.0025 | 0.0025 | 0.947 | 0.0028 | 0.0025 | -0.0714 | 0.0031 | 0.0029 | 0.932 |
| DE(0.67)       | 0.0055 | 0.0061           | 0.1091  | 0.0099 | 0.0098 | 0.952 | 0.0055 | 0.0042 | -0.2364 | 0.0098 | 0.0094 | 0.936 |
| IE(0.33, 0.67) | 0.0076 | 0.0099           | 0.3026  | 0.0068 | 0.0066 | 0.933 | 0.0076 | 0.0071 | -0.0658 | 0.0073 | 0.0069 | 0.946 |
| TE(0.33, 0.67) | 0.0131 | 0.0160           | 0.2137  | 0.0112 | 0.0110 | 0.947 | 0.0131 | 0.0113 | -0.1374 | 0.0097 | 0.0095 | 0.937 |
| OE(0.33, 0.67) | 0.0069 | 0.0086           | 0.2464  | 0.0055 | 0.0054 | 0.952 | 0.0069 | 0.0062 | -0.1014 | 0.0056 | 0.0053 | 0.924 |

<sup>a</sup> IPW = Mean of inverse probability weighted estimates; ESE = empirical standard error; ASE = average estimated standard error; CP = empirical coverage probability).

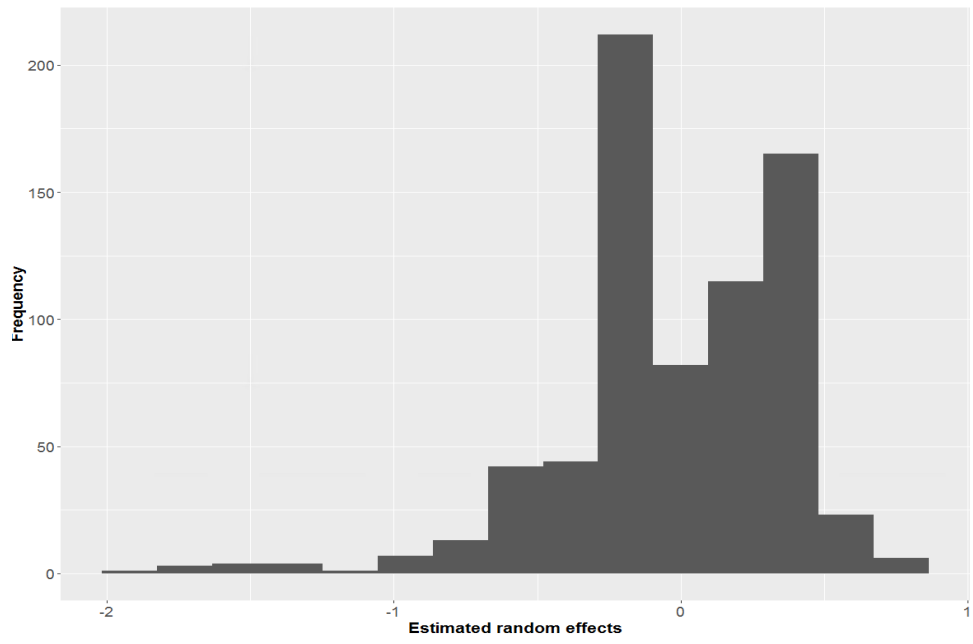

Figure 1: Distribution of the estimated random effects from the cluster-level propensity score model used in the analysis of disseminated effects in Optum’s de-identified Clinformatics® Data Mart Database, 2010-2017, United States.

Table A4: International Classification of Diseases (ICD)-9/10-CM codes for opioid use disorder, opioid overdose and other comorbidities used in the analysis of disseminated effects in Optum’s de-identified Clinformatics® Data Mart Database, 2010-2015, United States

| Condition                        | ICD Version                                                                        | Code            | Description                                                                                         |
|----------------------------------|------------------------------------------------------------------------------------|-----------------|-----------------------------------------------------------------------------------------------------|
| Opioid use disorder <sup>1</sup> | 9                                                                                  | 304.00-304.03   | Opioid type dependence (unspecified; continuous; episodic)                                          |
|                                  |                                                                                    | 304.70-304.73   | Combinations of opioid type drug with any other drug dependence (unspecified; continuous; episodic) |
|                                  |                                                                                    | 305.50-305.53   | Opioid abuse (unspecified; continuous; episodic)                                                    |
| Opioid overdose <sup>2,3</sup>   | 9                                                                                  | 965.0x          | Poisoning by opiates and related narcotics                                                          |
|                                  |                                                                                    | E850.0 - E850.2 | Accidental poisoning by heroin, methadone, or other opiates                                         |
|                                  | 10                                                                                 | T40.0           | Poisoning by, adverse effect of and underdosing of opium                                            |
|                                  |                                                                                    | T40.1           | Poisoning by and adverse effect of heroin                                                           |
|                                  |                                                                                    | T40.2           | Poisoning by, adverse effect of and underdosing of other opioids                                    |
|                                  |                                                                                    | T40.3           | Poisoning by, adverse effect of and underdosing of methadone                                        |
| T40.6 <sup>4</sup>               | Poisoning by, adverse effect of and underdosing of other and unspecified narcotics |                 |                                                                                                     |
| Depression <sup>5</sup>          | 9                                                                                  | 296.2           | Major depressive disorder single episode                                                            |
|                                  |                                                                                    | 296.3           | Major depressive disorder recurrent episode                                                         |
|                                  |                                                                                    | 296.5           | Bipolar i disorder, most recent episode (or current) depressed                                      |
|                                  |                                                                                    | 300.4           | Dysthymic disorder                                                                                  |
|                                  |                                                                                    | 309             | Adjustment reaction                                                                                 |
|                                  |                                                                                    | 311             | Depressive disorder, not elsewhere classified                                                       |

<sup>1</sup> Olfson, M., Wall, M., Wang, S., Crystal, S., and Blanco, C. (2018). Service use preceding opioid-related fatality. *American Journal of Psychiatry*, 175(6), 538-544..

<sup>2</sup> Frazier, W., Cochran, G., Lo-Ciganic, W. H., Gellad, W. F., Gordon, A. J., Chang, C. C. H., and Donohue, J. M. (2017). Medication-assisted treatment and opioid use before and after overdose in Pennsylvania Medicaid. *JAMA*, 318(8), 750-752.

<sup>3</sup> Daly, E. R., Dufault, K., Swenson, D. J., Lakevicius, P., Metcalf, E., and Chan, B. P. (2017). Use of emergency department data to monitor and respond to an increase in opioid overdoses in New Hampshire, 2011-2015. *Public Health Reports*, 132(suppl), 73S-79S.

<sup>4</sup> Excluding T406.06 and T40.696.

<sup>5</sup> Tonelli, M., Wiebe, N., Fortin, M., Guthrie, B., Hemmelgarn, B. R., James, M. T., ... and Sargious, P. (2016). Methods for identifying 30 chronic conditions: application to administrative data. *BMC Medical Informatics and Decision Making*, 15(1), 1-11.
